# Supplementary material for: Thermal Surface Properties, London Dispersive and Polar Sur-face Energy of Graphene and Carbon Materials by Inverse Gas Chromatography at Infinite Dilution
Source: Preprints.org preprint supplement (doi:10.20944/preprints202405.1631.v1), 2024-05-24
Supplement: Supplementary file 1 [file supplementary]

**Support information**

**Thermal Surface Properties, London Dispersive and Polar Surface Energy of Graphene and Carbon Materials by Inverse Gas Chromatography at Infinite Dilution**

Tayssir Hamieh1,2

1Faculty of Science and Engineering, Maastricht University, P.O. Box 616, 6200 MD Maastricht, Netherlands, E-mail: [t.hamieh@maastrichtuniversity.nl](mailto:t.hamieh@maastrichtuniversity.nl)

2Laboratory of Materials, Catalysis, Environment and Analytical Methods (MCEMA), Faculty of Sciences, Lebanese University, 1533, Hadath, Lebanon

**
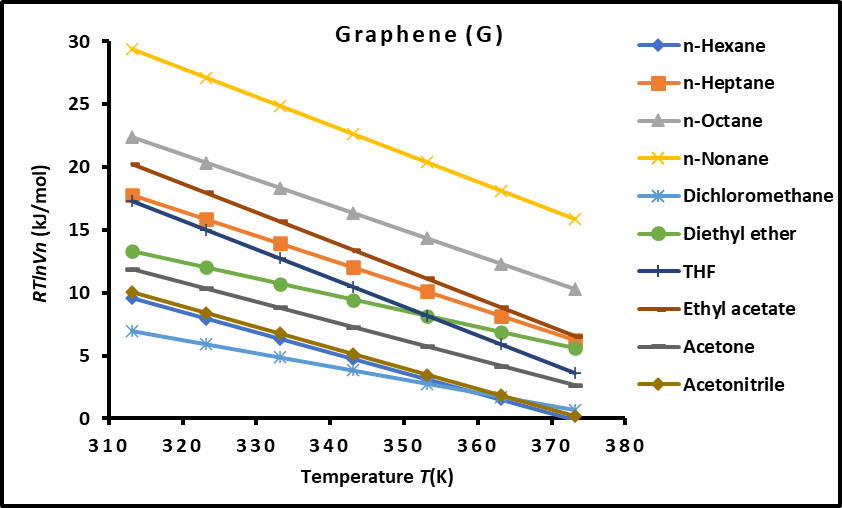
**

**(a)**

**
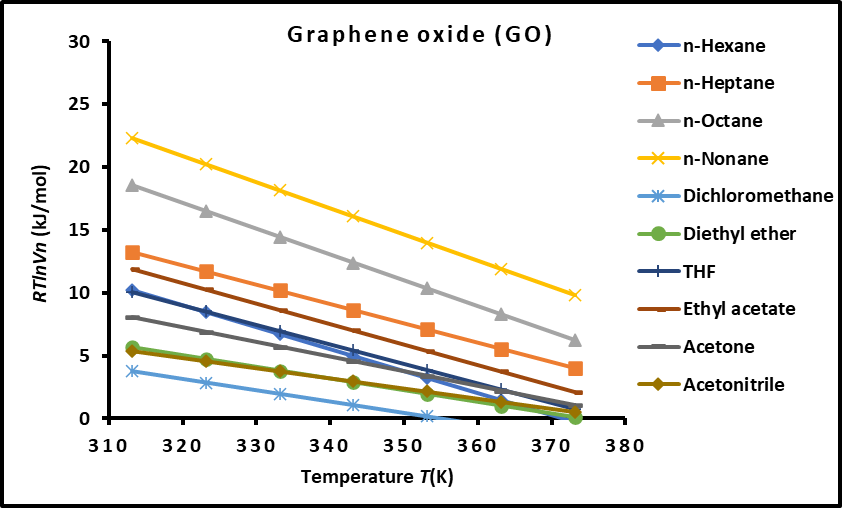
**

**(b)**

**
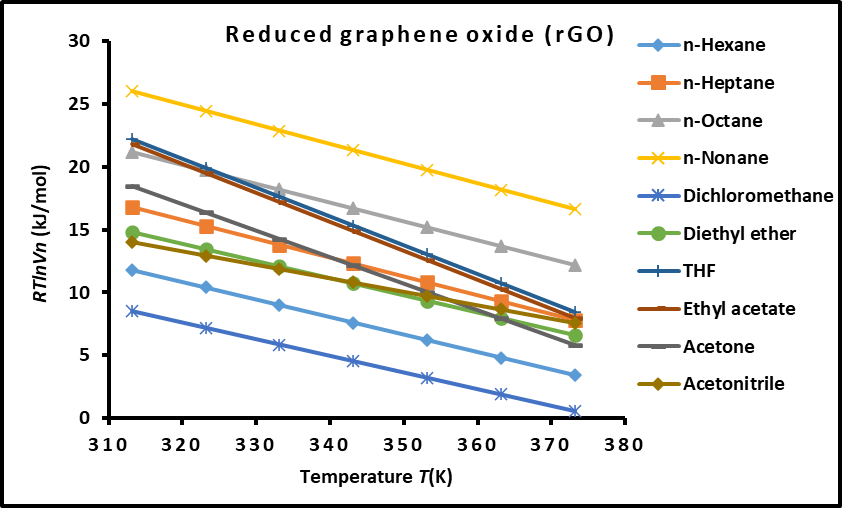
**

**(c)**

**
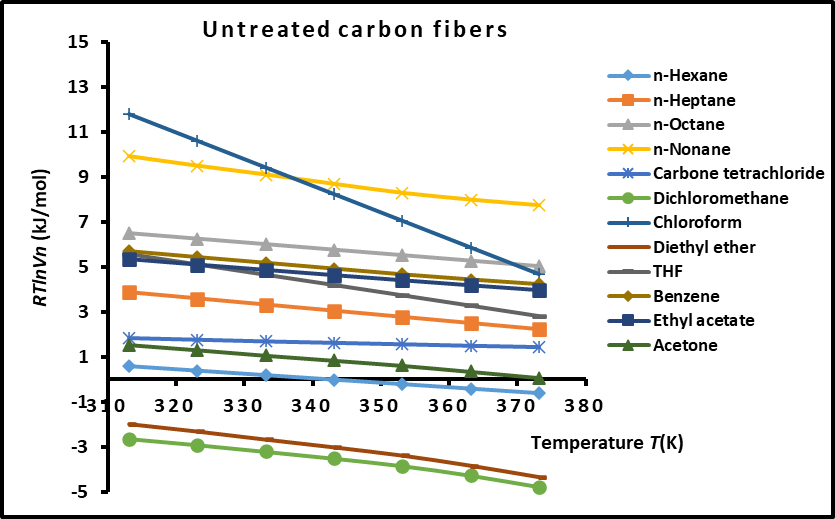
**

**(d)**

**
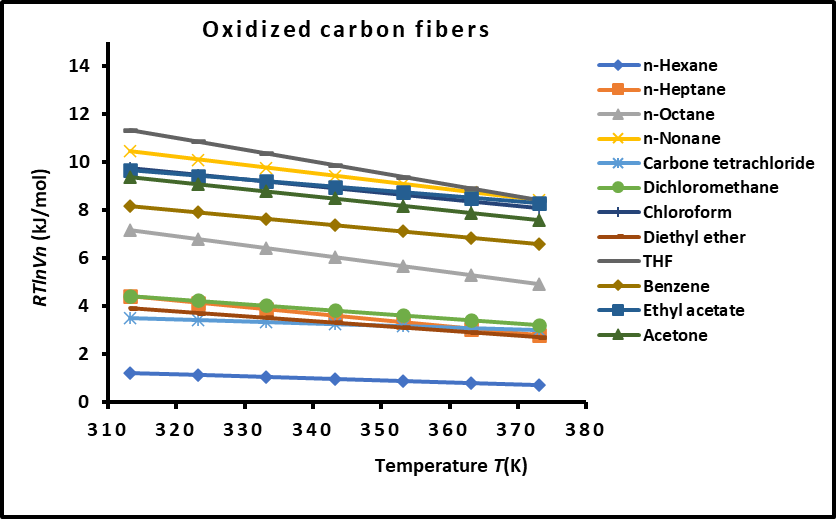
**

**(e)**

**Figure S1.** Variations of of n-alkanes and polar molecules adsorbed on the various solid materials against the temperature. (a): Graphene, (b): Graphene oxide, (c): Reduced graphene oxide, (d) Untreated carbon fibers, and (e): Oxidized carbon fibers.

**Table S1.** Values of (in kJ/mol)of polar molecules adsorbed on the various solid materials against the temperature. Graphene, Graphene oxide, Reduced graphene oxide, Untreated carbon fibers, and Oxidized carbon fibers.

| **(in kJ/mol)** | | **Graphene** | | | | | |
| --- | --- | --- | --- | --- | --- | --- | --- |
| T(K) | Dichloromethane | | Diethyl ether | THF | Ethyl acetate | Acetone | Acetonitrile |
| 313.15 | 12.938 | | 21.537 | 20.104 | 22.191 | 25.247 | 32.890 |
| 323.15 | 12.993 | | 20.456 | 19.156 | 21.658 | 24.461 | 33.199 |
| 333.15 | 13.048 | | 19.376 | 18.207 | 21.125 | 23.676 | 33.508 |
| 343.15 | 13.102 | | 18.294 | 17.258 | 20.591 | 22.889 | 33.816 |
| 353.15 | 13.157 | | 17.214 | 16.310 | 20.057 | 22.104 | 34.125 |
| 363.15 | 13.211 | | 16.134 | 15.362 | 19.524 | 21.318 | 34.434 |
| 373.15 | 13.265 | | 15.052 | 14.412 | 18.990 | 20.531 | 34.742 |
| **(in kJ/mol)** | | **Graphene oxide** | | | | | |
| T(K) | Dichloromethane | | Diethyl ether | THF | Ethyl acetate | Acetone | Acetonitrile |
| 313.15 | 2.309 | | 9.736 | 8.668 | 11.657 | 12.238 | 18.469 |
| 323.15 | 2.749 | | 9.445 | 8.404 | 11.603 | 12.414 | 19.019 |
| 333.15 | 3.192 | | 9.157 | 8.143 | 11.552 | 12.592 | 19.571 |
| 343.15 | 3.639 | | 8.873 | 7.887 | 11.504 | 12.772 | 20.122 |
| 353.15 | 4.082 | | 8.584 | 7.626 | 11.452 | 12.950 | 20.674 |
| 363.15 | 4.523 | | 8.294 | 7.363 | 11.400 | 13.127 | 21.225 |
| 373.15 | 4.964 | | 8.003 | 7.100 | 11.347 | 13.304 | 21.775 |
| **(in kJ/mol)** | | **Reduced graphene oxide** | | | | | |
| T(K) | Dichloromethane | | Diethyl ether | THF | Ethyl acetate | Acetone | Acetonitrile |
| 313.15 | 10.175 | | 20.953 | 17.327 | 21.696 | 20.831 | 19.905 |
| 323.15 | 10.148 | | 19.968 | 16.364 | 20.849 | 20.987 | 20.995 |
| 333.15 | 10.123 | | 18.983 | 15.403 | 20.000 | 21.141 | 22.080 |
| 343.15 | 10.095 | | 17.995 | 14.438 | 19.151 | 21.296 | 23.168 |
| 353.15 | 10.068 | | 17.009 | 13.474 | 18.302 | 21.451 | 24.257 |
| 363.15 | 10.042 | | 16.023 | 12.512 | 17.453 | 21.604 | 25.341 |
| 373.15 | 10.013 | | 15.035 | 11.547 | 16.604 | 21.758 | 26.429 |
| **(in kJ/mol)** | | **Untreated carbon fibers** | | | | | |
| T(K) | Dichloromethane | | Diethyl ether | THF | Ethyl acetate | Acetone | Chloroform |
| 313.15 | 4.130 | | 2.133 | 11.809 | 9.471 | 10.681 | 15.339 |
| 323.15 | 3.872 | | 1.873 | 11.455 | 9.381 | 10.499 | 14.255 |
| 333.15 | 3.614 | | 1.613 | 11.101 | 9.291 | 10.317 | 13.171 |
| 343.15 | 3.356 | | 1.353 | 10.747 | 9.201 | 10.135 | 12.087 |
| 353.15 | 3.098 | | 1.093 | 10.393 | 9.111 | 9.953 | 11.003 |
| 363.15 | 2.840 | | 0.833 | 10.039 | 9.021 | 9.771 | 9.919 |
| 373.15 | 2.582 | | 0.573 | 9.685 | 8.931 | 9.589 | 8.835 |
| **(in kJ/mol)** | | **Oxidized carbon fibers** | | | | | |
| T(K) | Dichloromethane | | Diethyl ether | THF | Ethyl acetate | Acetone | Chloroform |
| 313.15 | 10.526 | | 7.399 | 17.009 | 13.204 | 17.919 | 12.794 |
| 323.15 | 10.235 | | 7.187 | 16.443 | 12.962 | 17.462 | 12.519 |
| 333.15 | 9.944 | | 6.975 | 15.877 | 12.720 | 17.005 | 12.244 |
| 343.15 | 9.653 | | 6.763 | 15.311 | 12.478 | 16.548 | 11.969 |
| 353.15 | 9.362 | | 6.551 | 14.745 | 12.236 | 16.091 | 11.694 |
| 363.15 | 9.071 | | 6.339 | 14.179 | 11.994 | 15.634 | 11.419 |
| 373.15 | 8.780 | | 6.127 | 13.613 | 11.752 | 15.177 | 11.144 |

**Table S2.** Values of () of polar molecules adsorbed on the different graphene and carbon materials

| Materials | Dichloromethane | Diethyl ether | THF | Ethyl acetate | Acetone | Acetonitrile |
| --- | --- | --- | --- | --- | --- | --- |
| Graphene | 11.234 | 55.379 | 49.808 | 38.894 | 49.855 | 23.224 |
| Graphene oxide | -11.565 | 18.765 | 16.833 | 13.261 | 6.6652 | 1.2085 |
| Reduced graphene oxide | 11.017 | 51.84 | 47.496 | 48.277 | 21.295 | 23.168 |
| Untreated carbon fibers | 12.209 | 49.284 | 10.275 | 22.895 | 12.289 | - |
| Oxidized carbon fibers | 19.639 | 21.406 | 14.038 | 34.733 | 20.782 | - |

**Table S3.** Values of () of polar molecules adsorbed on the different graphene and carbon materials

| Materials | Dichloromethane | Diethyl ether | THF | Ethyl acetate | Acetone | Acetonitrile |
| --- | --- | --- | --- | --- | --- | --- |
| Graphene | -5.4 | -44.3 | 2.7 | 25.8 | 29.1 | -5.4 |
| Graphene oxide | 108.1 | 28.8 | 98.6 | 108.4 | 27.5 | 108.1 |
| Reduced graphene oxide | 94.9 | 26.1 | 96.3 | 26.0 | 21.2 | 94.9 |
| Untreated carbon fibers | 53.3 | 5.1 | 84.9 | 35.4 | 56.6 | - |
| Oxidized carbon fibers | 78.6 | -17.8 | -15.4 | 9.0 | 24.2 | - |

**Table S4.** Values of polar acid-base energies , , , and total surface energy () of the different graphenes and carbon materials at various temperatures.

| Materials | T(K) | 313.15 | 323.15 | 333.15 | 343.15 | 353.15 | 363.15 | 373.15 |
| --- | --- | --- | --- | --- | --- | --- | --- | --- |
| Graphene |  | 167.08 | 162.07 | 157.32 | 152.79 | 148.51 | 144.41 | 140.52 |
|  | 73.55 | 68.61 | 63.95 | 59.53 | 55.36 | 51.42 | 47.70 |
|  | 221.71 | 210.91 | 200.61 | 190.75 | 181.34 | 172.35 | 163.73 |
|  | 500.90 | 472.02 | 443.90 | 416.53 | 389.88 | 363.98 | 338.77 |
| Graphene oxide |  | 5.32 | 7.25 | 9.41 | 11.79 | 14.29 | 16.93 | 19.68 |
|  | 20.29 | 19.69 | 19.12 | 18.58 | 18.05 | 17.53 | 17.03 |
|  | 20.78 | 23.91 | 26.84 | 29.60 | 32.12 | 34.45 | 36.61 |
|  | 139.0 | 133.2 | 127.4 | 121.7 | 116.1 | 110.5 | 105.0 |
| Reduced graphene oxide |  | 103.34 | 98.87 | 94.69 | 90.70 | 86.96 | 83.44 | 80.07 |
|  | 70.30 | 63.58 | 57.32 | 51.50 | 46.10 | 41.09 | 36.46 |
|  | 170.47 | 158.57 | 147.35 | 136.69 | 126.62 | 117.11 | 108.06 |
|  | 321.4 | 305.8 | 290.7 | 275.9 | 261.6 | 247.4 | 233.5 |
| Untreated carbon fibers |  | 17.03 | 14.39 | 12.07 | 10.02 | 8.23 | 6.67 | 5.32 |
|  | 13.40 | 12.87 | 12.37 | 11.89 | 11.42 | 10.98 | 10.55 |
|  | 30.20 | 27.22 | 24.44 | 21.83 | 19.40 | 17.12 | 14.99 |
|  | 86.5 | 80.2 | 74.4 | 68.5 | 62.9 | 58.2 | 53.9 |
| Oxide carbon fibers |  | 110.59 | 100.57 | 91.37 | 82.93 | 75.19 | 68.08 | 61.56 |
|  | 26.04 | 24.58 | 23.19 | 21.86 | 20.60 | 19.41 | 18.27 |
|  | 107.33 | 99.43 | 92.06 | 85.16 | 78.72 | 72.70 | 67.07 |
|  | 163.2 | 151.0 | 139.4 | 128.4 | 117.9 | 107.9 | 98.4 |
